# Supplementary material for: A Phylogeographic Description of Histoplasma capsulatum in the United States
Source: MDPI journal article supplement (doi:10.3390/jof9090884), 2023-08-29
Supplement: s1 [file s1]

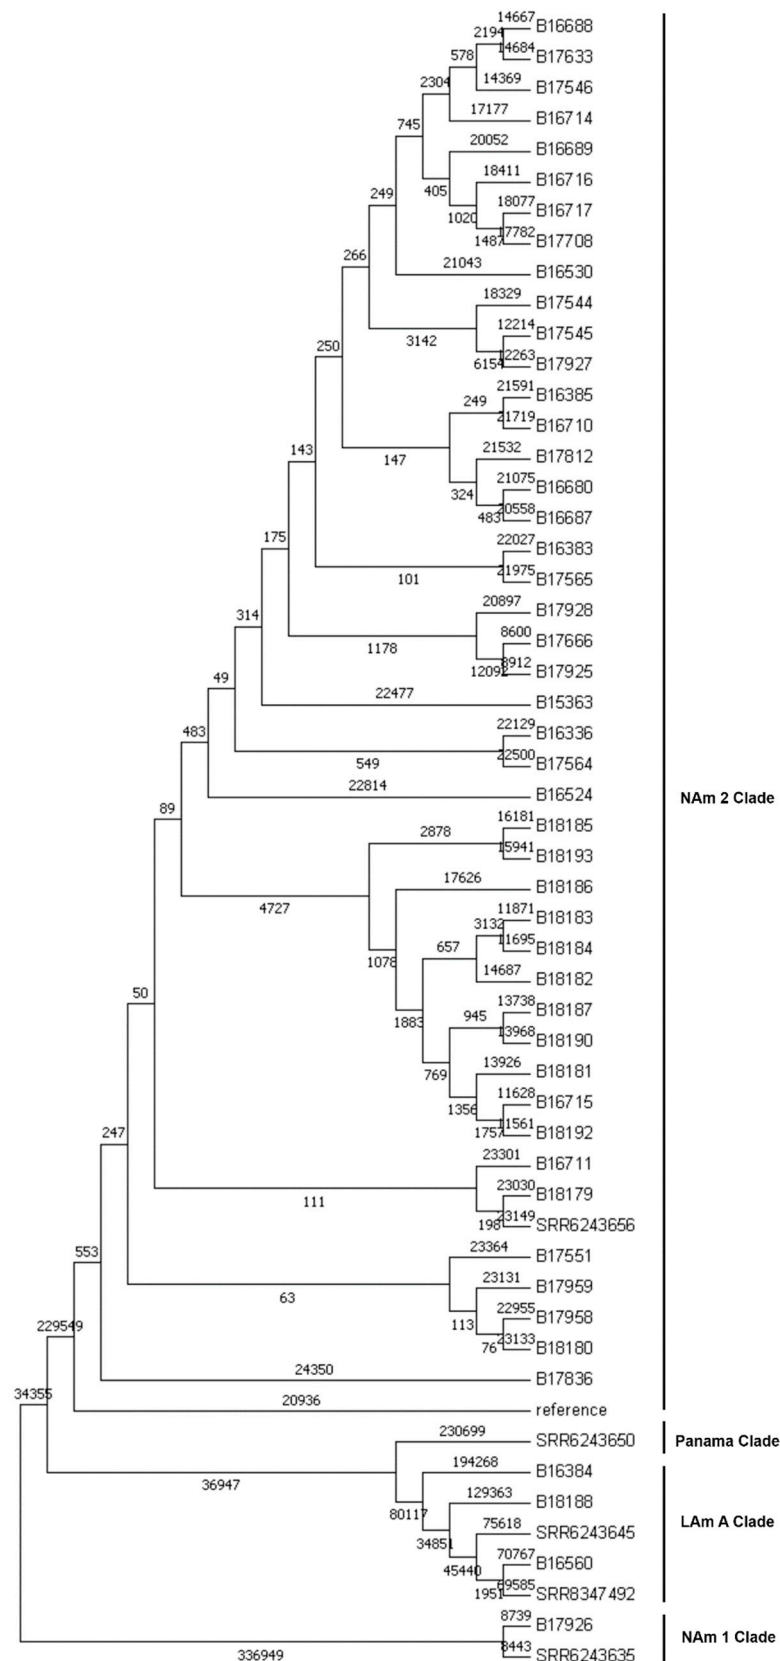

**Supplementary Figure S1:** Neighbor-joining tree of *H. capsulatum* isolates showing SNP differences.

The neighbor-joining tree includes 48 isolates and 5 control samples along with a reference belonging to the NAM 2 clade. Most of the isolates clustered with the NAM 2 clade control sample, while three isolates clustered with the LAm A clade, and one with the NAM 1 clade. The values present on the tree branches are SNP values.
