# Supplementary material for: A Phylogeographic Description of Histoplasma capsulatum in the United States
Source: J Fungi (Basel). 2023 Aug 29;9(9):884. doi: 10.3390/jof9090884 (PMC10532573; doi:10.3390/jof9090884)
Supplement: Supplementary file 1 [file jof-09-00884-s001.zip › S1_Hcapsulatum_isolates_metadata.xlsx]

## Sheet: Sheet1
Sample_names	Species_name	Collection_date	Host	Source	Country	State	BioProject accession	Accession #
B15363	[Histoplasma] capsulatum	2018-08-09	Homo sapiens	Blood	United States	Michigan	PRJNA868688	SAMN30261147
B16336	[Histoplasma] capsulatum	2018-09-19	Homo sapiens	Blood	United States	Michigan	PRJNA868688	SAMN30261148
B16383	[Histoplasma] capsulatum	2018-10-15	Homo sapiens	Bone marrow	United States	Michigan	PRJNA868688	SAMN30261149
B16384	[Histoplasma] capsulatum	2018-10-15	Homo sapiens	Lympho node tissue	United States	Michigan	PRJNA868688	SAMN30261150
B16385	[Histoplasma] capsulatum	2018-10-15	Homo sapiens	Blood	United States	Michigan	PRJNA868688	SAMN30261151
B16524	[Histoplasma] capsulatum	2018-10-16	Homo sapiens	Unknown	United States	Indiana	PRJNA868688	SAMN30261152
B16530	[Histoplasma] capsulatum	2018-10-26	Homo sapiens	BAL	United States	Michigan	PRJNA868688	SAMN30261153
B16560	[Histoplasma] capsulatum	2018-11-13	Homo sapiens	Sputum	United States	Louisiana	PRJNA868688	SAMN30261154
B16680	[Histoplasma] capsulatum	2018-11-20	Homo sapiens	Sputum	United States	Kentucky	PRJNA868688	SAMN30261155
B16687	[Histoplasma] capsulatum	2018-11-30	Homo sapiens	Blood	United States	Kentucky	PRJNA868688	SAMN30261156
B16688	[Histoplasma] capsulatum	2018-11-30	Homo sapiens	Fluid-Bronchial	United States	Michigan	PRJNA868688	SAMN30261157
B16689	[Histoplasma] capsulatum	2018-12-04	Homo sapiens	Arm Tissue	United States	Michigan	PRJNA868688	SAMN30261158
B16710	[Histoplasma] capsulatum	2018-12-12	Homo sapiens	Lung	United States	Indiana	PRJNA868688	SAMN30261159
B16711	[Histoplasma] capsulatum	2018-12-12	Homo sapiens	Lung Tissue	United States	Wisconsin	PRJNA868688	SAMN30261160
B16714	[Histoplasma] capsulatum	2018-12-20	Homo sapiens	Lung-Wound	United States	Michigan	PRJNA868688	SAMN30261161
B16715	[Histoplasma] capsulatum	2018-12-20	Homo sapiens	Fluid-BAL	United States	Wisconsin	PRJNA868688	SAMN30261162
B16716	[Histoplasma] capsulatum	2018-12-26	Homo sapiens	Whole blood	United States	Michigan	PRJNA868688	SAMN30261163
B16717	[Histoplasma] capsulatum	2018-12-28	Homo sapiens	Blood	United States	Michigan	PRJNA868688	SAMN30261164
B17544	[Histoplasma] capsulatum	2019-01-11	Homo sapiens	BAL	United States	Michigan	PRJNA868688	SAMN30261165
B17545	[Histoplasma] capsulatum	2019-01-11	Homo sapiens	Blood	United States	Michigan	PRJNA868688	SAMN30261166
B17546	[Histoplasma] capsulatum	2019-01-11	Homo sapiens	Bronchial washing	United States	Michigan	PRJNA868688	SAMN30261167
B17551	[Histoplasma] capsulatum	2019-01-17	Homo sapiens	Bronchial washing	United States	Nebraska	PRJNA868688	SAMN30261168
B17564	[Histoplasma] capsulatum	2019-01-31	Homo sapiens	Wound	United States	Kentucky	PRJNA868688	SAMN30261169
B17565	[Histoplasma] capsulatum	2019-02-05	Homo sapiens	Sputum	United States	Kentucky	PRJNA868688	SAMN30261170
B17633	[Histoplasma] capsulatum	2019-02-15	Homo sapiens	Bronchial washing	United States	Michigan	PRJNA868688	SAMN30261171
B17666	[Histoplasma] capsulatum	2019-03-12	Homo sapiens	Bronchial washing	United States	Michigan	PRJNA868688	SAMN30261172
B17708	[Histoplasma] capsulatum	2019-03-18	Homo sapiens	BAL	United States	Michigan	PRJNA868688	SAMN30261173
B17812	[Histoplasma] capsulatum	2019-04-25	Homo sapiens	BAL	United States	Michigan	PRJNA868688	SAMN30261174
B17836	[Histoplasma] capsulatum	2019-04-26	Homo sapiens	Blood	United States	Pennsylvania	PRJNA868688	SAMN30261175
B17925	[Histoplasma] capsulatum	2019-05-09	Homo sapiens	Bone marrow	United States	Michigan	PRJNA868688	SAMN30261176
B17926	[Histoplasma] capsulatum	2019-05-13	Homo sapiens	Bronchial washing	United States	Wisconsin	PRJNA868688	SAMN30261177
B17927	[Histoplasma] capsulatum	2019-05-21	Homo sapiens	BAL	United States	Michigan	PRJNA868688	SAMN30261178
B17928	[Histoplasma] capsulatum	2019-06-03	Homo sapiens	Fluid_synovial	United States	Michigan	PRJNA868688	SAMN30261179
B17958	[Histoplasma] capsulatum	NA	Homo sapiens	Lymph node	United States	Wisconsin	PRJNA868688	SAMN30261180
B17959	[Histoplasma] capsulatum	NA	Homo sapiens	Lymph node	United States	Wisconsin	PRJNA868688	SAMN30261181
B18179	[Histoplasma] capsulatum	2019-08-02	Homo sapiens	Lymph node	United States	Minnesota	PRJNA868688	SAMN30261182
B18180	[Histoplasma] capsulatum	2019-08-02	Homo sapiens	Bronchial washing	United States	Minnesota	PRJNA868688	SAMN30261183
B18181	[Histoplasma] capsulatum	2019-08-02	Homo sapiens	Blood	United States	Minnesota	PRJNA868688	SAMN30261184
B18182	[Histoplasma] capsulatum	2019-08-02	Homo sapiens	Blood	United States	Minnesota	PRJNA868688	SAMN30261185
B18183	[Histoplasma] capsulatum	2019-08-02	Homo sapiens	Blood	United States	Minnesota	PRJNA868688	SAMN30261186
B18184	[Histoplasma] capsulatum	2019-08-02	Homo sapiens	Bronchial washing	United States	Minnesota	PRJNA868688	SAMN30261187
B18185	[Histoplasma] capsulatum	2019-08-02	Homo sapiens	Bronchial washing	United States	Minnesota	PRJNA868688	SAMN30261188
B18186	[Histoplasma] capsulatum	2019-08-02	Homo sapiens	Bronchial washing	United States	Minnesota	PRJNA868688	SAMN30261189
B18187	[Histoplasma] capsulatum	2019-08-02	Homo sapiens	Blood	United States	Minnesota	PRJNA868688	SAMN30261190
B18188	[Histoplasma] capsulatum	2019-08-02	Homo sapiens	Tissue	United States	Minnesota	PRJNA868688	SAMN30261191
B18190	[Histoplasma] capsulatum	2019-08-02	Homo sapiens	Bone marrow	United States	Minnesota	PRJNA868688	SAMN30261192
B18192	[Histoplasma] capsulatum	2019-08-02	Homo sapiens	Bronchial washing	United States	Minnesota	PRJNA868688	SAMN30261193
B18193	[Histoplasma] capsulatum	2019-08-02	Homo sapiens	Sputum	United States	Minnesota	PRJNA868688	SAMN30261194
